# Supplementary material for: Down-regulation of coasy, the gene associated with NBIA-VI, reduces Bmp signaling, perturbs dorso-ventral patterning and alters neuronal development in zebrafish
Source: PubMed Central journal article supplement (PMC5124858; doi:10.1038/srep37660), 2016-11-28
Supplement: srep37660-s1.pdf [file srep37660-s1.pdf]

**Down-regulation of *coasy*, the gene associated with NBIA-VI, reduces Bmp signaling, perturbs dorso-ventral patterning and alters neuronal development in zebrafish.**

Deepak Khatri<sup>1°</sup>, Daniela Zizioli<sup>1°</sup>, Natascia Tiso<sup>2</sup>, Nicola Facchinello<sup>2</sup>, Sara Vezzoli<sup>1</sup>, Alessandra Gianoncelli<sup>1</sup>, Maurizio Memo<sup>1</sup>, Eugenio Monti<sup>1</sup>, Giuseppe Borsani<sup>1</sup>, Dario Finazzi<sup>1,3\*</sup>.

Figure S1

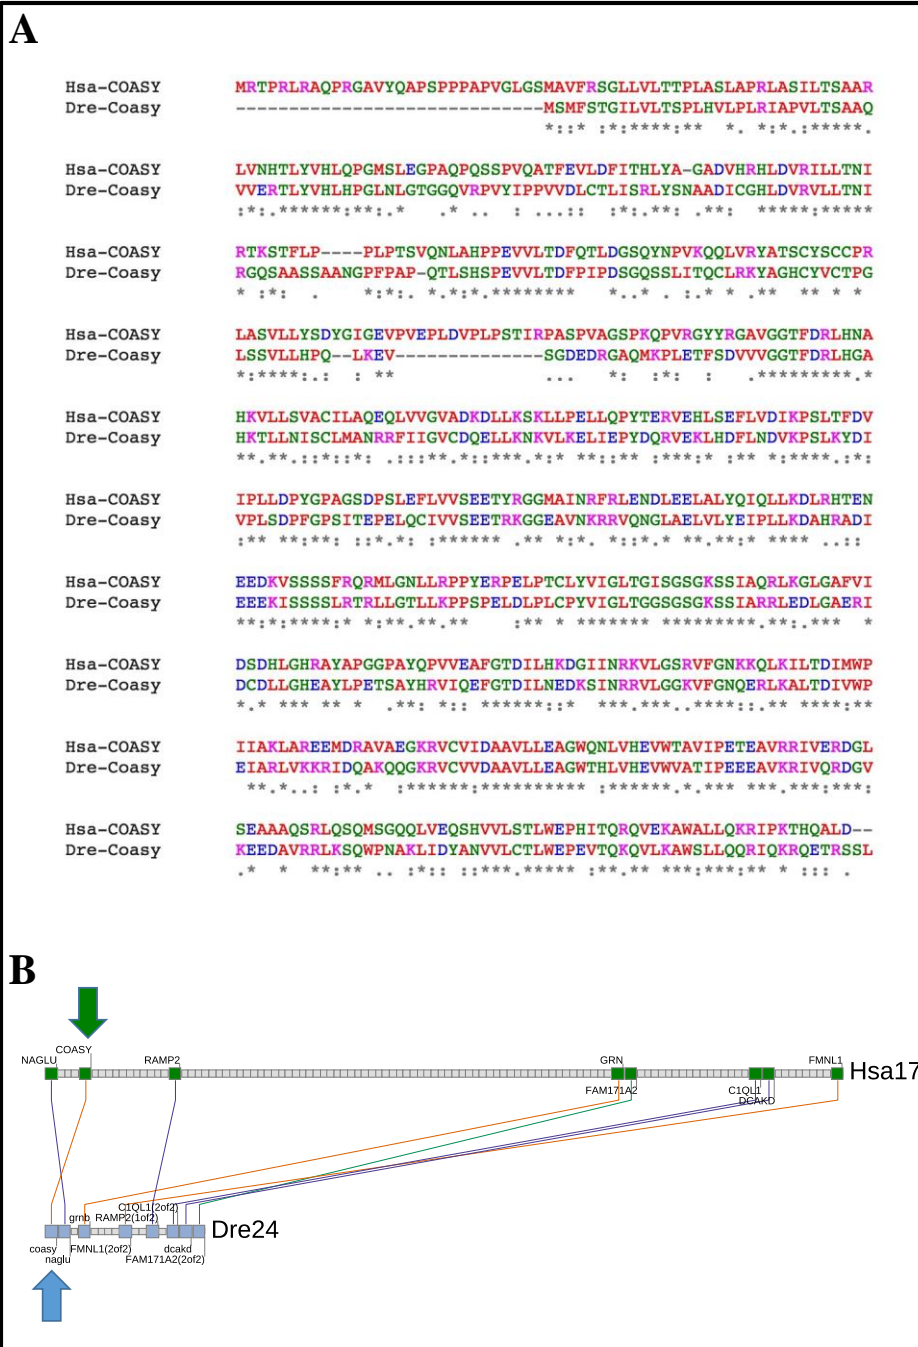

**Figure S2**

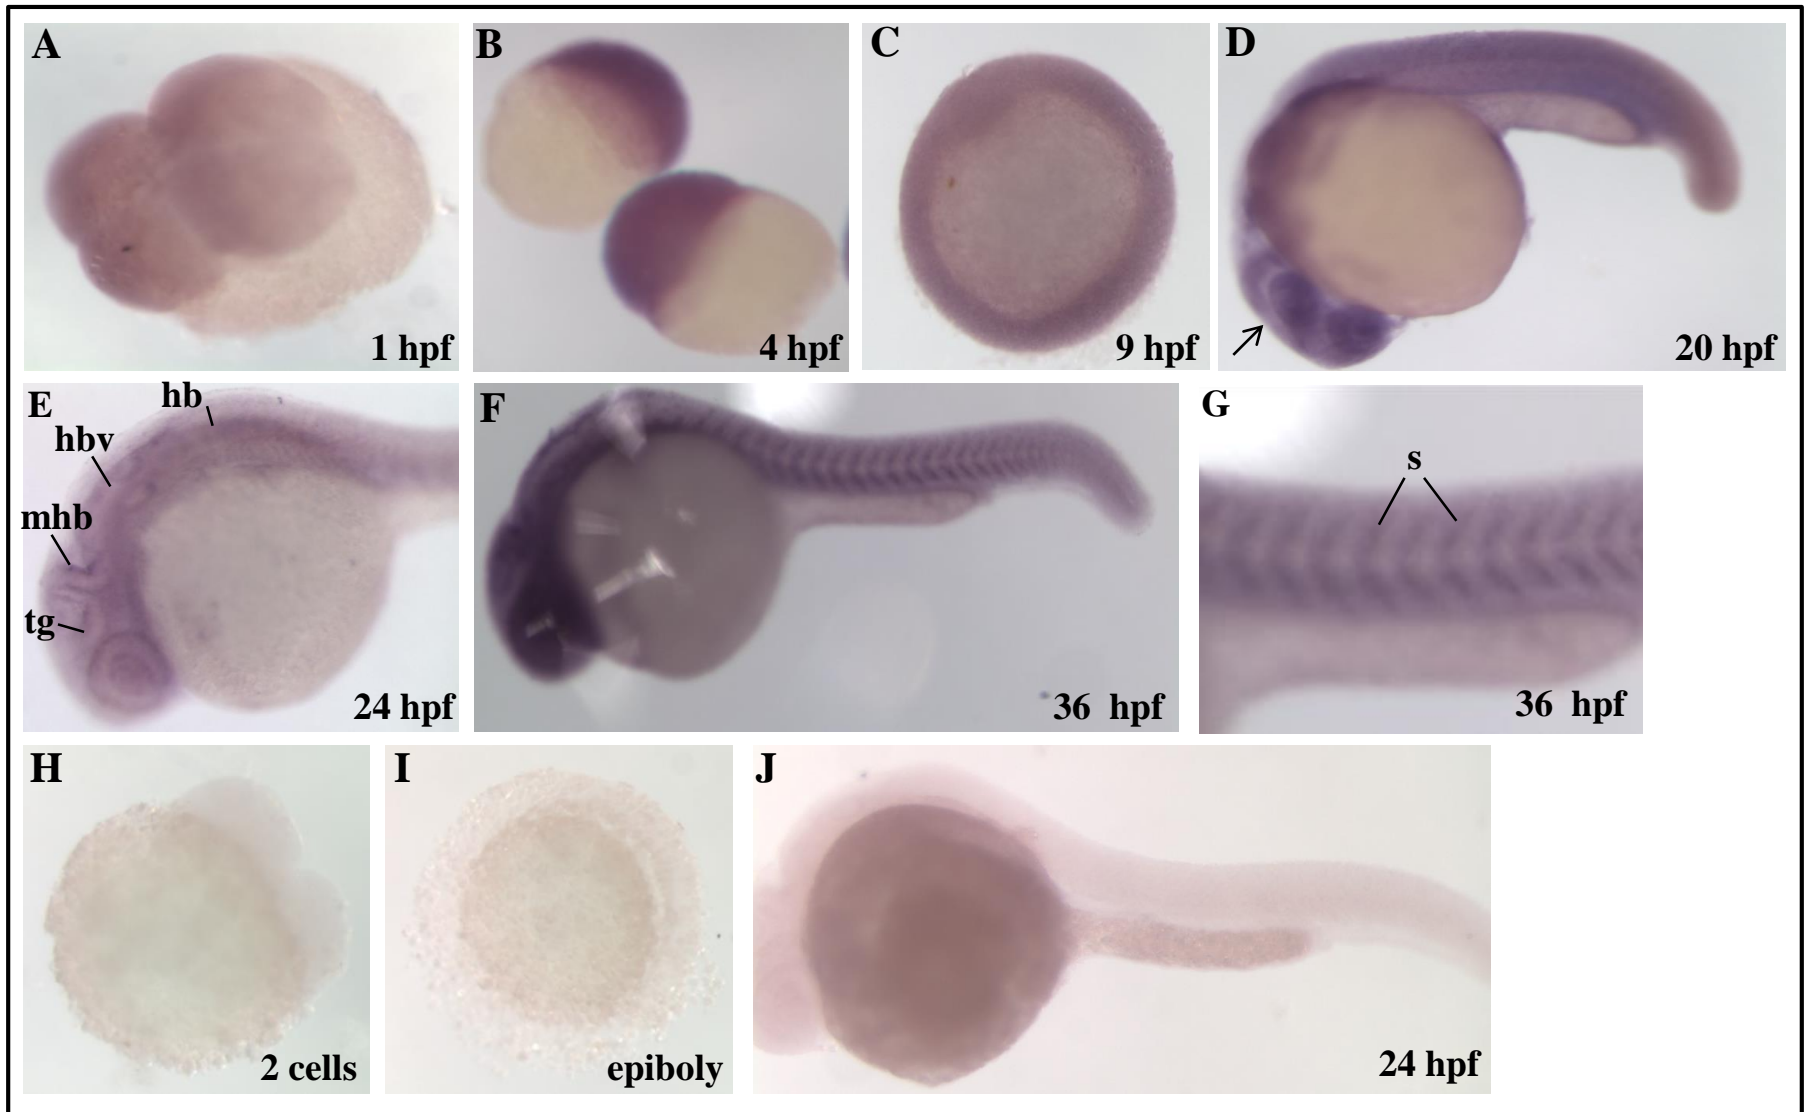

**Figure S3**

**A Expression of *coasy* in different developmental stages**

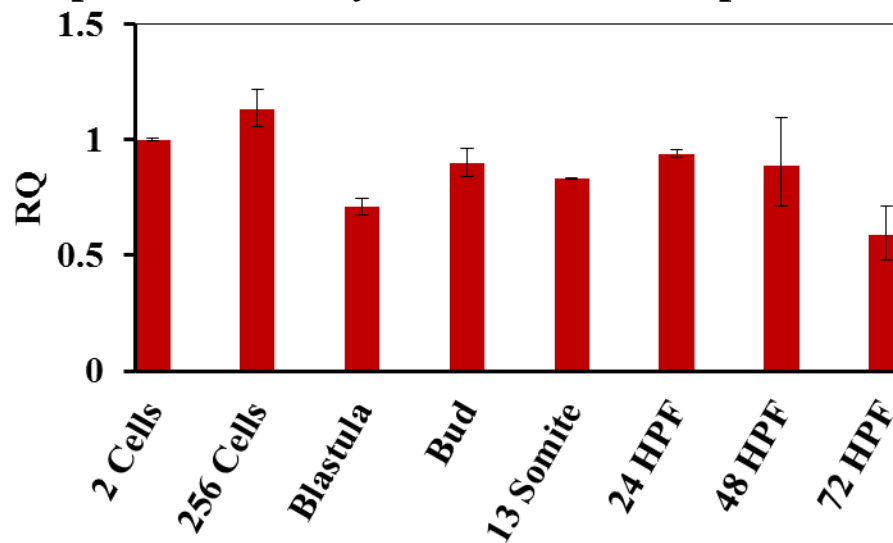

**B Expression of *coasy* in different organs**

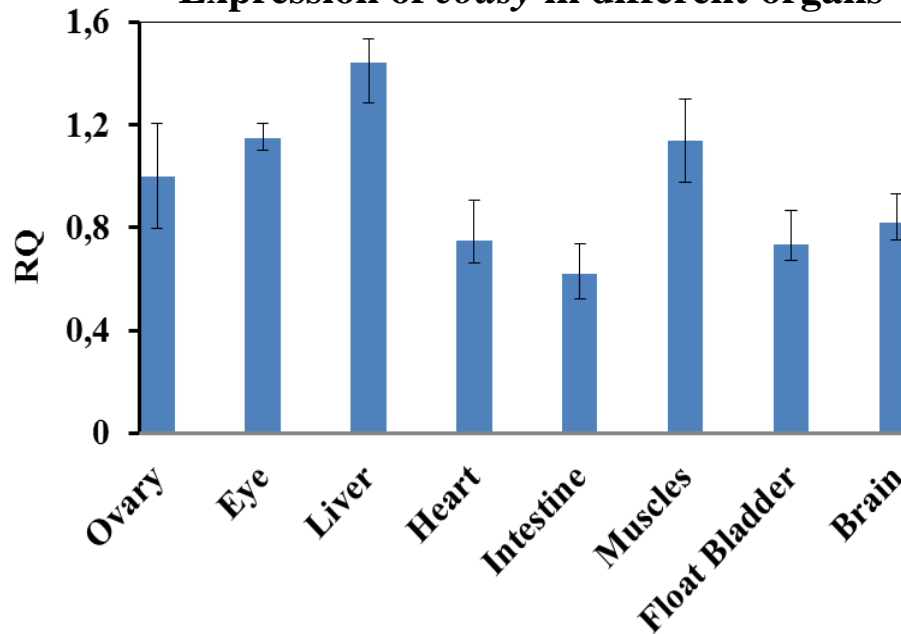

**Figure S4**

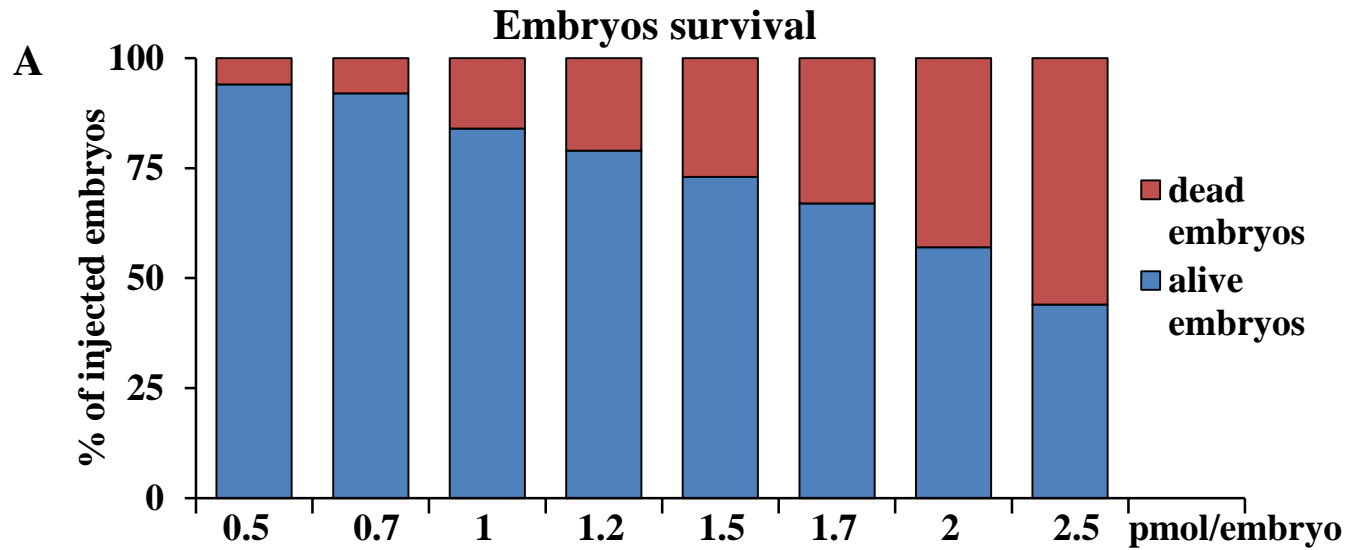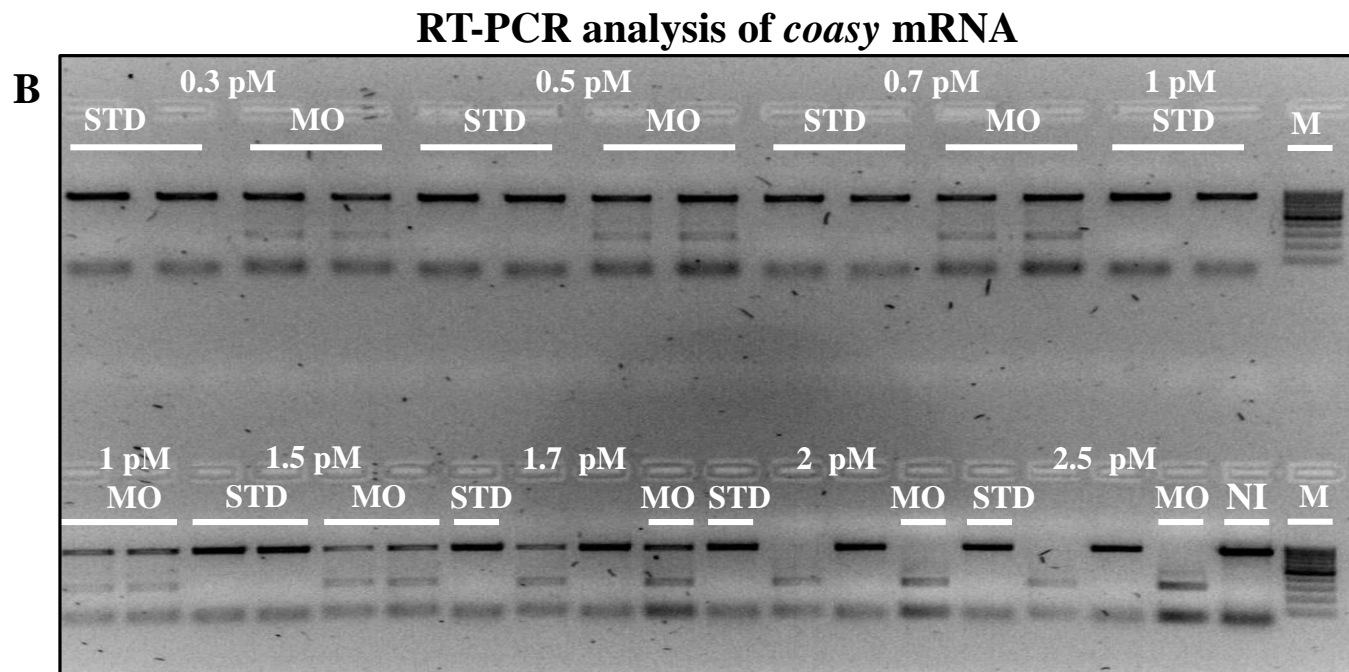

# Figure S5

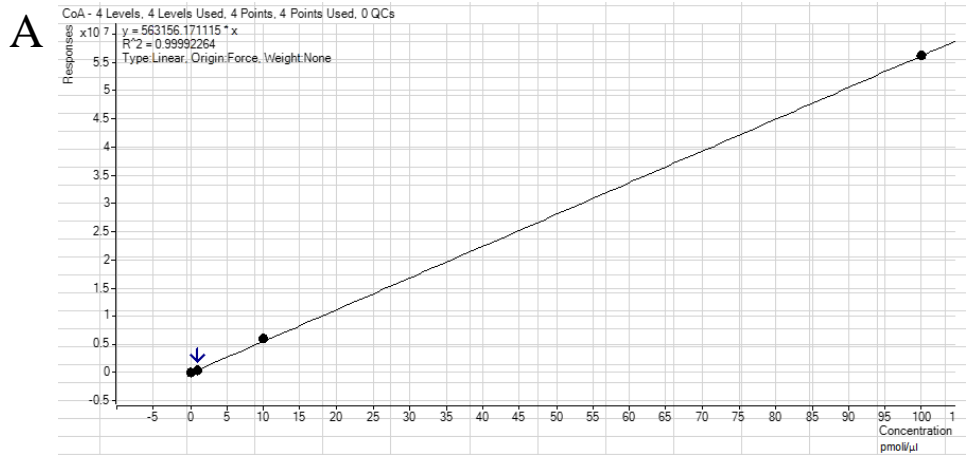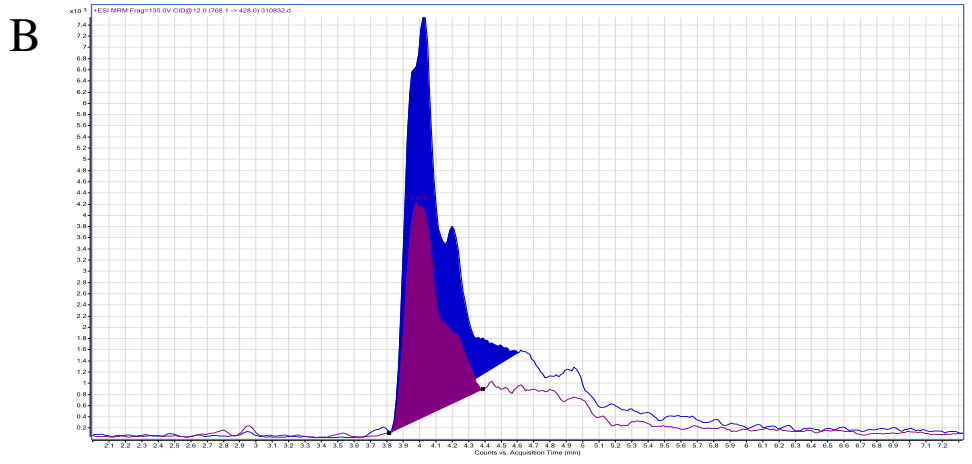

**Figure S6**

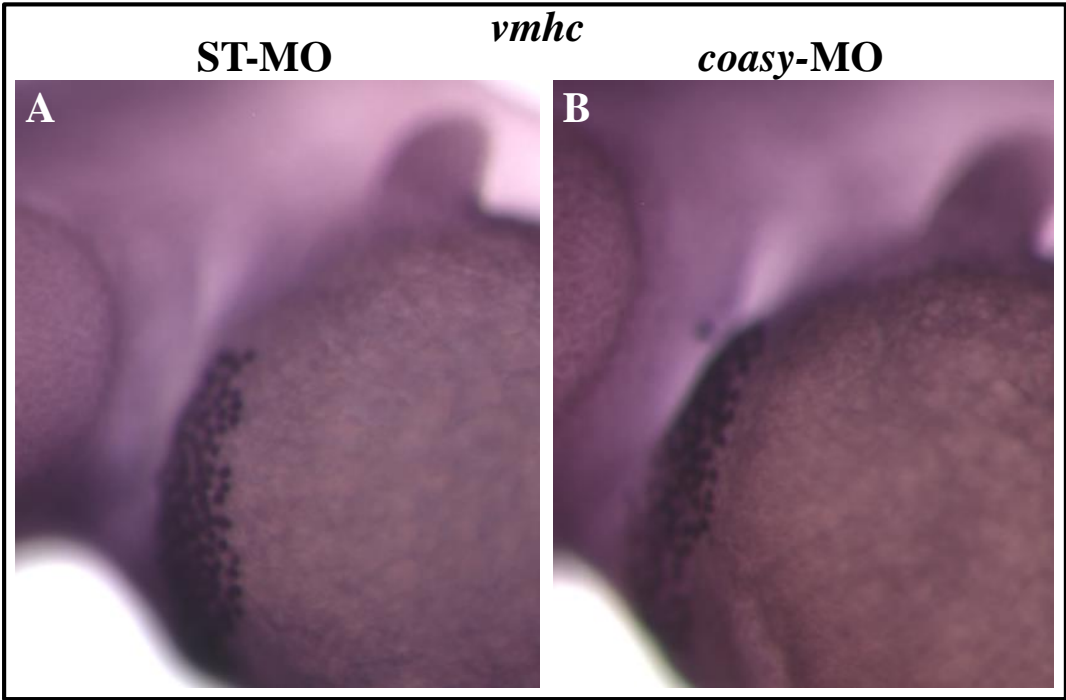

Figure S7

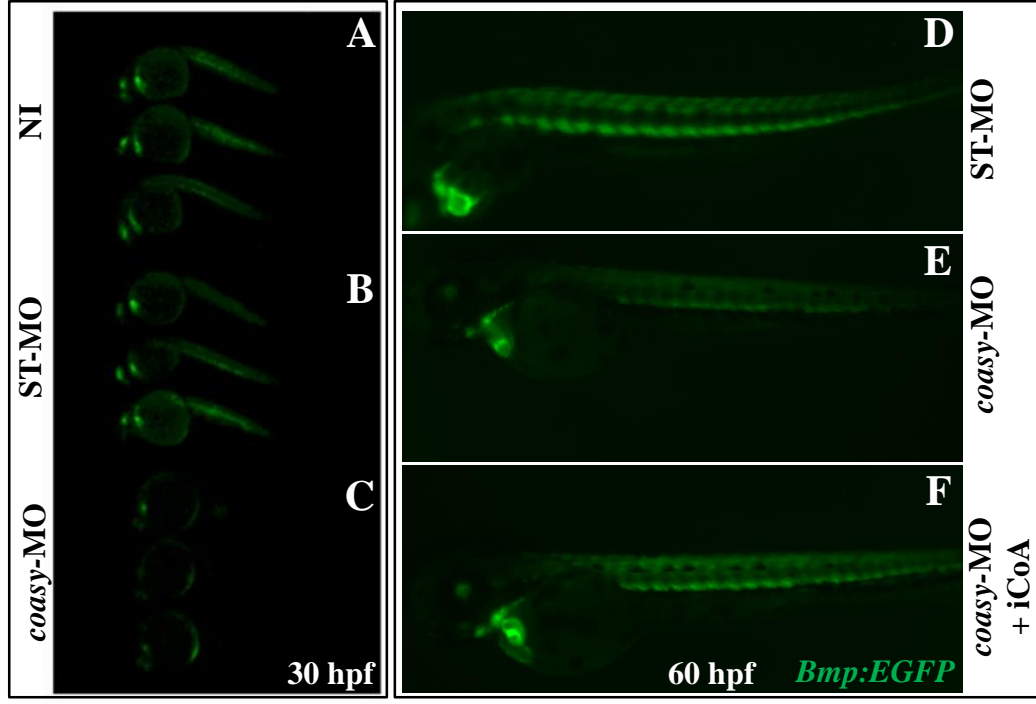



**Figure S8**

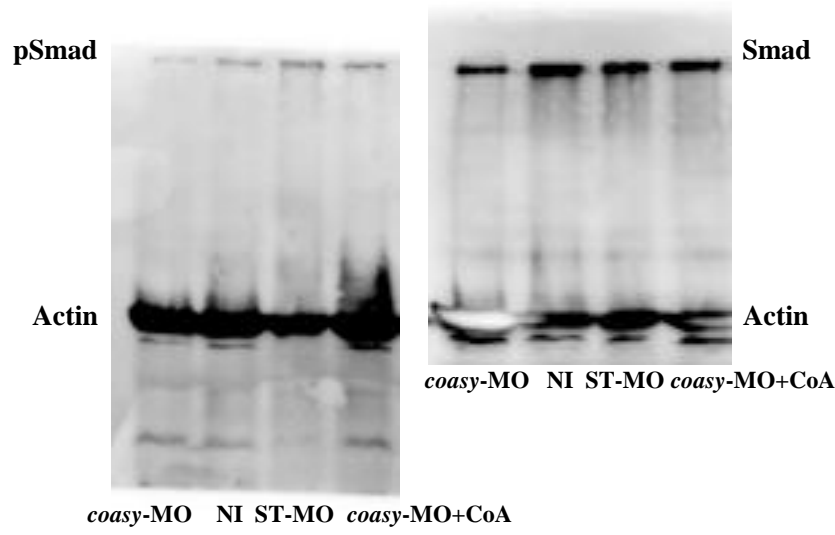

**Figure S9**

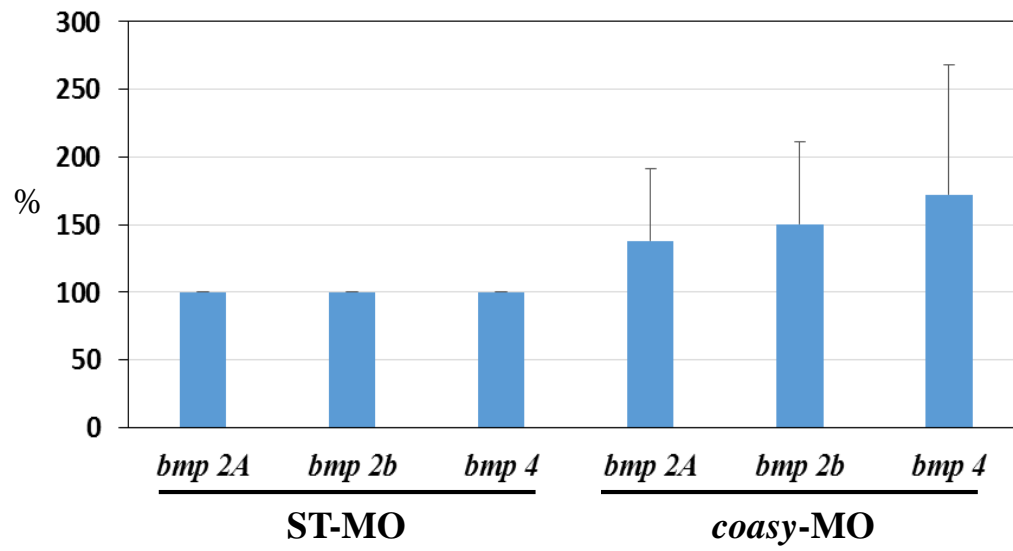

**Figure S10**

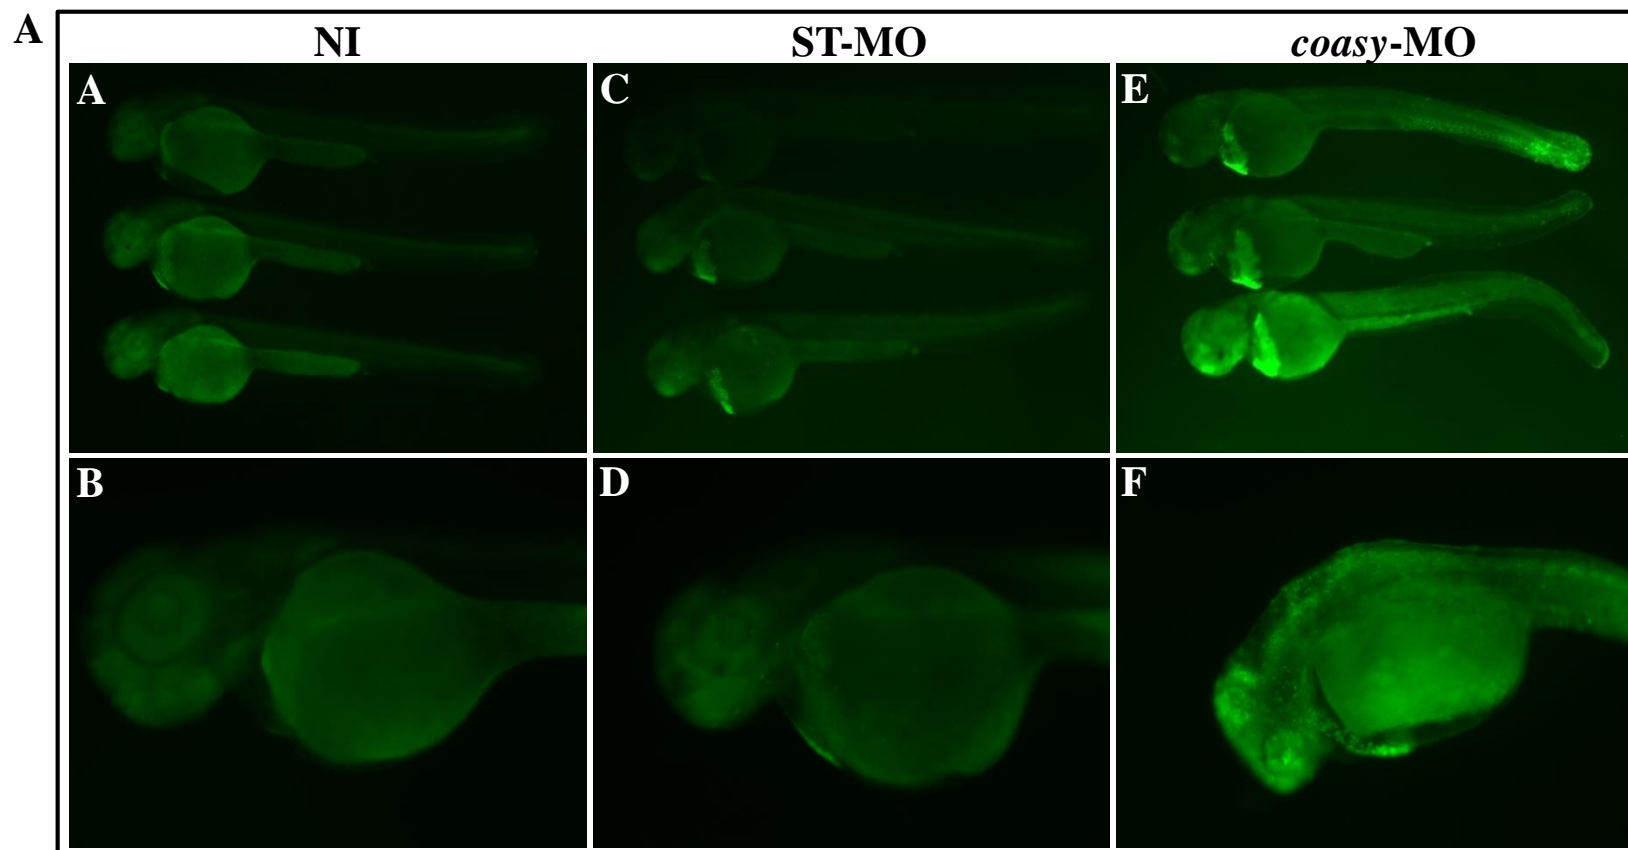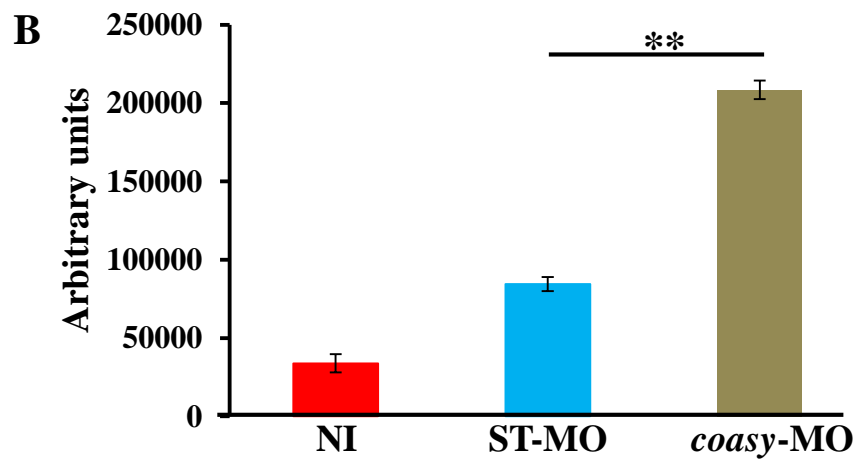

## Table S1

|                  | 48 hpf      |             |             | 60 hpf      |             |            |
|------------------|-------------|-------------|-------------|-------------|-------------|------------|
|                  | H-T         | Y-T         | E.D.        | H-T         | Y-T         | E.D.       |
| WT               | 2.90 ± 0.17 | 1.82 ± 0.15 | 8,2 ± 0.10  | 3.80 ± 0.17 | 1.88 ± 0.14 | 1.0 ± 0.1  |
| <i>coasy</i> -MO | 1.76 ± 0.19 | 0.82 ± 0.11 | 0.39 ± 0.10 | 2.25 ± 0.18 | 1.18 ± 0.2  | 5,5 ± 0.08 |

Table S1 Morphometric measures.

Head-Trunk (H-T), Yolk-Trunk (Y-T) and Eye Diameter (E:D) size were measured in 10 wild-type embryos and 10 *coasy* morphants (1.2 pmol/embryo) at 48 and 60 hpf. Mean plus standard deviation is shown. All measures are in mm and  $P < 0,0001$  for all comparisons.

**Table S2**

| Oligo    |                                | Sequence                         |
|----------|--------------------------------|----------------------------------|
| coasy-MO | <i>coasy</i> morpholino        | ACCACCTGAACATAGACATACAGCA        |
| ST-MO    | standard morpholino            | CCTCTTACCTCAGTTACAATTTATA        |
| QP1      | <i>coasy</i> real time RT-PCR  | CATTGGCTCTTCAGTCTCCTC            |
| QP2      | <i>coasy</i> real time RT-PCR  | AGGTTTGGGTCGCAACTATC             |
| A1       | <i>actin</i> real time RT-PCR  | CGAGCAGGAGATGGGAACC              |
| A2       | <i>actin</i> real time RT-PCR  | CAACGGAAACGCTCATTGC              |
| P3       | cloning of <i>coasy</i> probe  | TCCGGAATTCACCTCCACTGTCTGACCCCTT  |
| P4       | cloning of <i>coasy</i> probe  | TCCGCTCGAGTCAGAGTGAAGATCTTGTCTCT |
| P5       | <i>coasy</i> RT-PCR (exon 1-3) | GTCCTCACGTCCCCATTACA             |
| P6       | <i>coasy</i> RT-PCR (exon 1-3) | GTTTTGCACACGCCTCTTGT             |
| P7       | <i>bmpR1AA</i> RT-PCR          | TGTCTTCTTCTCACACTCTGCTC          |
| P8       | <i>bmpR1AA</i> RT-PCR          | TGTTCTTGGCATCATCGGGG             |
| P9       | <i>bmpR1AB</i> RT-PCR          | GTGTTAAAAGCATGCGGCCA             |
| P10      | <i>bmpR1AB</i> RT-PCR          | TGCCCCATAGGTCTGGTTA              |
| P11      | <i>bmpR1BA</i> RT-PCR          | GAGACGCTGAACAGGAACCA             |
| P12      | <i>bmpR1BA</i> RT-PCR          | TTGGGGAAGGAGGGTCGTAT             |
| P13      | <i>bmpR1BB</i> RT-PCR          | GCGCTACAGTATGGGTCTGG             |
| P14      | <i>bmpR1BB</i> RT-PCR          | CTCGTGTCTCATCAGGACGG             |
| P15      | <i>bmpR2A</i> RT-PCR           | CATCTTCTTGCCTGGTTGGACT           |
| P16      | <i>bmpR2A</i> RT-PCR           | AAAGACAAGTCCTTCCCCACG            |
| P17      | <i>bmpR2B</i> RT-PCR           | GTACTACCCTCATGGCTCGC             |
| P18      | <i>bmpR2B</i> RT-PCR           | GTGCGAAATGGCAGGTTTGT             |
| P19      | <i>bmp-2A</i> RT-PCR           | CAGGTTAGCAGACCCAGAGC             |
| P20      | <i>bmp-2A</i> RT-PCR           | AACTCCTCGTCTGGGATGGA             |
| P21      | <i>bmp-2B</i> RT-PCR           | ATGTAGAAAGGGCAGCCAGC             |
| P22      | <i>bmp-2B</i> RT-PCR           | CTCCGAGAACTTGGTCCCTG             |
| P23      | <i>bmp-4</i> RT-PCR            | CAGCACGTCAGCTTCGACTA             |
| P24      | <i>bmp-4</i> RT-PCR            | TGGCGCCTTTAACACCTCAT             |

Table S2. Sequences of oligo-morpholinos and primers described in the manuscript.

## SUPPLEMENTARY FIGURE LEGENDS.

### Figure S1. *In silico* analysis of *coasy* zebrafish gene

A) Multiple sequence alignment of human (Hsa) and zebrafish (Dre) COASY polypeptides obtained using the MUSCLE software. In the ClustalW output format asterisks indicate positions which have a conserved residue, colons indicate conservation between groups of strongly similar properties, while periods indicates conservation between groups of weakly similar properties. Residues are colored according to their physicochemical properties.

B) Composite cluster representation of conserved synteny around the *COASY* locus between *Homo sapiens* chromosome 17 (Hsa17) and *Danio rerio* chromosome 24, generated using the Synteny Database (100-gene sliding window). Genes are drawn as squares with their order, but not their physical location preserved. Colored squares are members of the cluster while grey squares represent genes in the interval but that do not have orthologs (or paralogs) in the other segments. Lines connecting squares between the two clusters represent orthologous or paralogous gene pairs. Eight gene pairs can be identified in this orthologous pairwise analysis performed based on *Danio rerio* Zv9 and *Homo sapiens* GRCH 37 genome assemblies.

### **Figure S2. Expression pattern of *coasy* transcript during zebrafish development**

Spatiotemporal analysis of *coasy* expression by WISH using a *coasy*-specific probe. WISH was performed from 0.2 hpf (1-2 cells) to 36 hpf with a *coasy*-specific antisense probe. (A) Dorsal view, four cells stage; (B) lateral view, sphere stage; (C) dorsal view, germ ring. (D-G) 20, 24, 36 hpf lateral views; (G) 36 hpf lateral view, magnification of somites. For each stage, at least 30 embryos were analyzed in two independent experiments. mhb, midbrain-hindbrain boundary; h, hindbrain; hbv, hindbrain ventricle; tg, tegmentum; s, somites.

A digoxigenin-labelled, *coasy* sense probe was synthesized as described in Material and Methods and applied for in situ hybridization with embryos at different developmental stages (H-J). No specific labelling was evident at any stage. Representative images from one experiment performed with at least 30 embryos and repeated twice.

### **Figure S3. Embryonal expression of *coasy* analyzed by Real Time RT-PCR.**

Total RNA was extracted from different developmental stages (A) and adult tissues/organs (B) and analyzed for *coasy* mRNA levels by real time RT-PCR. Results are expressed as relative quantification (RQ) and normalized to *actin beta 1* as endogenous reference gene. Data in graphs are from a representative experiment repeated twice with similar results.

**Figure S4. *coasy*-MO dose curve.**

To determine the efficiency of *coasy*-MO, we injected the morpholino at doses ranging from 0.5 to 2.5 pmol/embryo at one-two cell stage and compared them to embryos injected with the same amount of ST-MO. A) The graph shows the survival rate of embryos evaluated at 48 hpf. B) Representative agarose gel electrophoresis of RT-PCR products for *coasy* at 48 hpf from ST-MO (STD), *coasy*-MO-injected (MO), and not-injected embryos (NI) at different doses. Reduction of the upper band of 852 bp and appearance of the lower band of 281 bp is indicative of the altered splicing induced by *coasy*-MO.

**Figure S5. Quantification of CoA concentration in *coasy* morphants by LC-MS/MS.**

A) Representative calibration curve with 0.1, 1.0, 10, and 100 pmol/ $\mu$ l standard samples. B) The chromatogram represents the peak of the standard CoA (retention time 3.98 minutes) at a concentration of 1.0 pmol/ $\mu$ l.

The quantifier ion transition (768  $\rightarrow$  261 in blue) and the qualifier ion transition (768  $\rightarrow$  428 in violet) have been selected for the identification of CoA with high specificity.



**Figure S6. *coasy* deficiency does not affect heart development.**

Stereomicroscope lateral views of WISH analysis with *vmhc* probe on ST-(A) and *coasy*-MO (B) injected-embryos (1.2 pmol/embryo) at 48 hpf. *vmhc* marks the hearth ventricle. The experiment was performed with 25 embryos and repeated twice.

**Figure S7. Bmp activity at 30 hpf in the transgenic line Tg(*Bmp*:EGFP) and rescue by CoA injection**

Representative images of Tg(*Bmp*:EGFP) embryos not-injected (A, B) and injected with 1.2 pmol/embryo of ST-MO (C, D) or *coasy*-MO (E, F) at 30 hpf. A net reduction of the fluorescence intensity is evident in *coasy*-morphants. Results are from one representative experiment with at least 38 embryos out of two independent replicates. CoA (0.5 pmol/embryo) was injected in the craniofacial area of Tg(*Bmp*:EGFP) morphants at 24 hpf (I) and Bmp activity compared to that of untreated embryos (G, H) at 60 hpf. One representative experiment out of two replicates.

**Figure S8. Full size images of western blots for pSmad and Smad.**

Full size images of western blottings shown in figure 8 D.

**Figure S9. Real-Time RT-PCR for *bmp2a*, *bmp2b* and *bmp4*.**

ST-MO- and *coasy*-MO-injected embryos were analyzed by qRT-PCR for *bmp2a*, *bmp2b* and *bmp4* expression levels. Data are shown as percentage of the value observed in ST-MO-injected embryos and represent mean and SD of three independent experiments.

**Figure S10. Acridine Orange staining.**

A) Representative images of embryos not-injected (A, B) and injected with 1.2 pmol/embryo of ST-MO (C, D) or *coasy*-MO (E, F) at 48 hpf obtained by acridine orange staining to assess the presence of dead cells. Morphants show a significant increase of the fluorescence staining, particularly in brain and tail. B) The quantification of the fluorescence intensity performed by a plate reader shows a significant ( $P < 0.001$ ), 2.5-fold increase in *coasy*-MO-injected embryos. Results are from a representative experiment with at least 50 embryos, repeated at least three times.
